# Supplementary material
Source: PubMed Central journal article supplement (PMC6906767)
Supplement: ao9b02550_si_001.pdf [file ao9b02550_si_001.pdf]

## Supplementary Information

### **Extraction of polysaccharide from *Dendrobium nobile* Lindl. by subcritical water extraction**

Jing Liu <sup>a,\*</sup>, Yucheng Li <sup>a</sup>, Wangqu Liu <sup>a</sup>, Qi Qi <sup>a</sup>, Xin Hu <sup>a</sup>, Siya Li <sup>a</sup>, Jiandu Lei <sup>a,\*</sup>, Long Rong <sup>b</sup>

<sup>a</sup> Beijing Key Laboratory of Lignocellulosic Chemistry, Beijing Forestry University, Beijing 100083, P. R. China

<sup>b</sup> Key Laboratory for Biomechanics and Mechanobiology of Ministry of Education, Beihang University, Beijing 100191, PR China

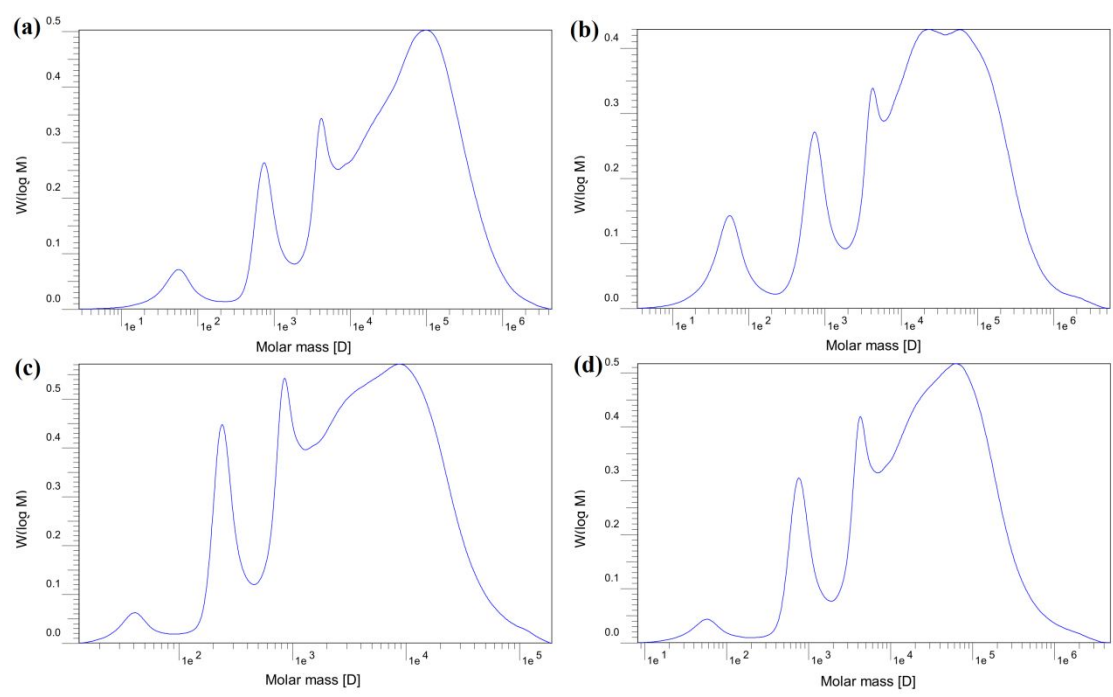

Figure S1 Gel permeation chromatography of polysaccharides from stirring extraction (a), refluxing extraction (b), ultrasound extraction (c), and subcritical water extraction (d).

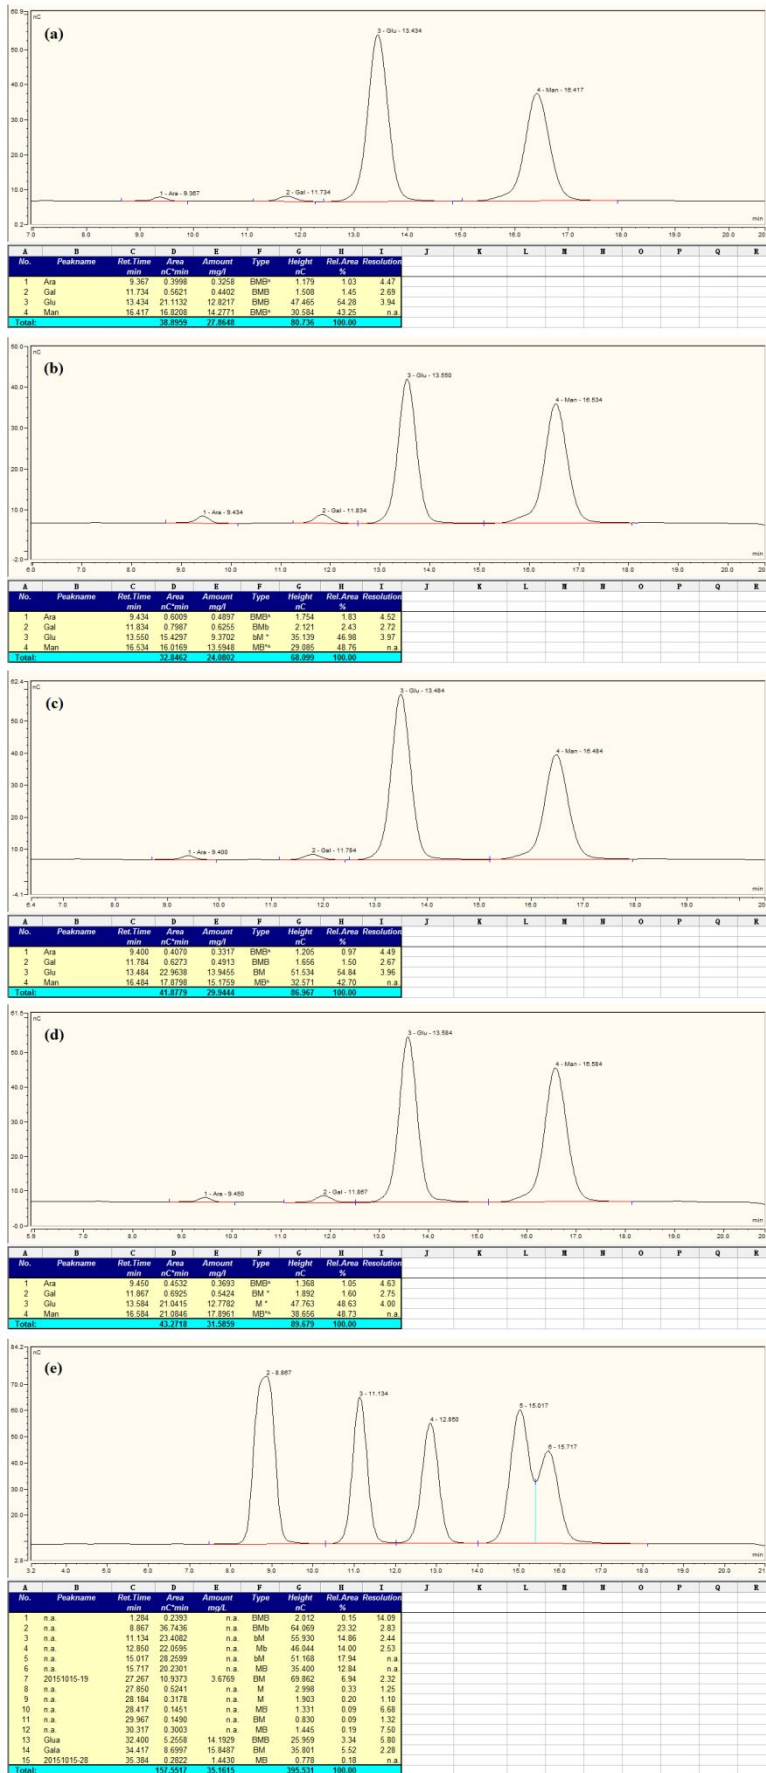

Figure S2 High-performance anion-exchange chromatography of monosaccharide

composition from stirring extraction (a), refluxing extraction (b), ultrasound extraction (c), subcritical water extraction (d), and monosaccharide standards (e) .
